# Supplementary material for: Serum proteomic predicts effectiveness and reveals potential biomarkers for complications in liver transplant patients
Source: publisher site journal article supplement (doi:10.18632/aging.103381), 2020-06-12
Supplement: Supplementary file [file aging-v12i12-103381-supplementary-material-SD1.pdf]

## SUPPLEMENTARY FIGURE

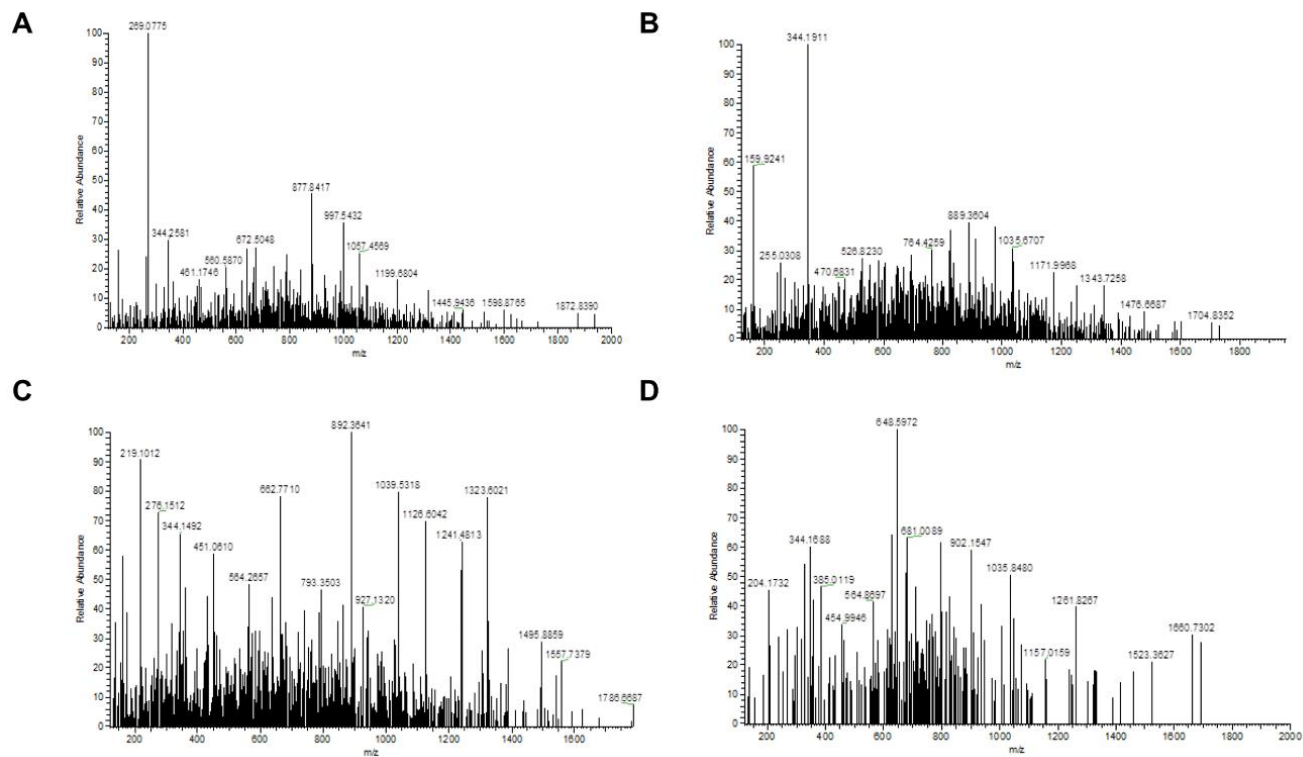

**Supplementary Figure 1. MS/MS spectrometry fragment map. (A) Peak 1, m/z: 4100.81. (B) Peak 2, m/z: 1949.9. (C) Peak 3, m/z: 2666.86. (D) Peak 4, m/z: 2087.71.**
